# Supplementary material for: Room temperature curable silica ink
Source: Royal Society of Chemistry journal article supplement (doi:10.1039/c4ra06479h), 2014-09-15
Supplement: c4ra06479h1.pdf [file c4ra06479h1.pdf]

## Supporting Information

### Room Temperature Curable Silica Ink

*Jobin Varghese, Kuzhichalil P Surendran and Mailadil T Sebastian\**

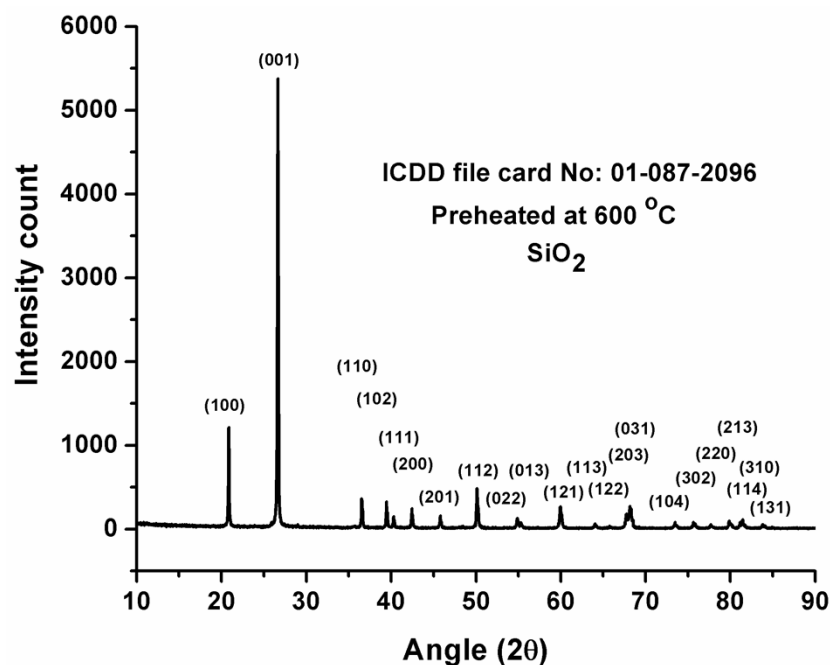

**Figure S1.** X-ray diffraction pattern of preheated SiO<sub>2</sub> powder.

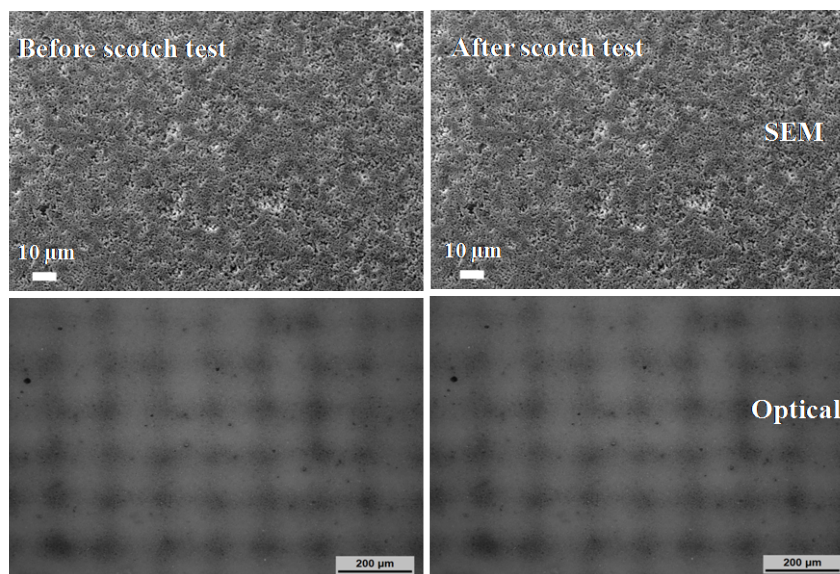

**Figure S2.** Optical and SEM images of screen printed silica ink before and after scotch test analysis.

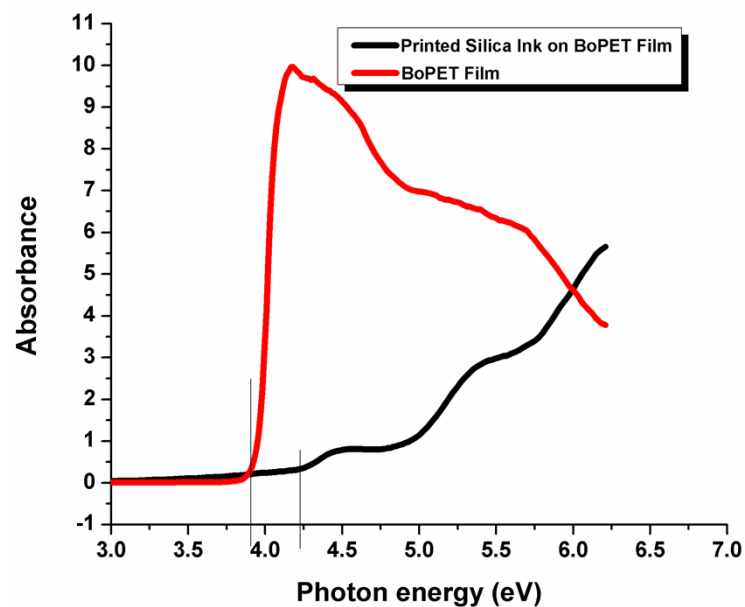

**Figure S3.** UV absorption spectrum of printed silica ink on BoPET fim and BoPET film.

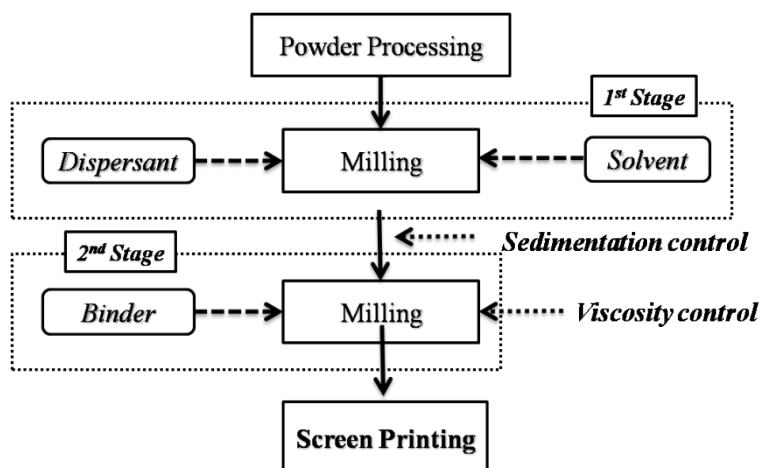

**Figure S4.** Flow chart of screen printing ink preparation.

**Table S1.** Comparison of surface roughness of screen printed silica ink on BoPET film and BoPET film.

| <b>Surfaces</b>                      | <b>Silica ink screen<br/>printed on BoPET<br/>film</b> | <b>BoPET film</b>   |
|--------------------------------------|--------------------------------------------------------|---------------------|
| Scan area                            | 10X10 $\mu\text{m}$                                    | 10X10 $\mu\text{m}$ |
| Average roughness ( $S_a$ )          | 370 nm                                                 | 21 nm               |
| Root mean square ( $S_q$ )           | 478 nm                                                 | 32 nm               |
| Surface skewness ( $S_{sk}$ )        | -0.089                                                 | 0.416               |
| Coefficient of kurtosis ( $S_{ku}$ ) | 0.546                                                  | 5.589               |
